# Supplementary material for: Thermal degradation of formamidinium based lead halide perovskites into sym-triazine and hydrogen cyanide observed by coupled thermogravimetry-mass spectrometry analysis
Source: Royal Society of Chemistry journal article supplement (doi:10.1039/c9ta06058h), 2019-01-01
Supplement: c9ta06058h1.pdf [file c9ta06058h1.pdf]

# **Thermal degradation of formamidinium based lead halide perovskites into *sym*-triazine and hydrogen cyanide observed by coupled thermogravimetry - mass spectrometry analysis**

Emilio J. Juarez-Perez<sup>\*a,b</sup>, Luis K. Ono<sup>a</sup>, Yabing Qi<sup>\*,a</sup>

**\*e-mail: ejjuarezperez@unizar.es; Yabing.Qi@OIST.jp**

<sup>a</sup>*Energy Materials and Surface Sciences Unit (EMSSU), Okinawa Institute of Science and Technology Graduate University (OIST), 1919-1 Tancha, Onna-son, Okinawa 904-0495, Japan*

<sup>b</sup>*ARAID Foundation, Institute of Nanoscience of Aragon (INA), University of Zaragoza. 50018 Zaragoza, Spain*

**Detailed calculations for estimation of maximum release achievable per meter-square of FA based perovskite based solar cell and hydrogen cyanide instantaneous concentration observed during low temperature heating tests and.**

Maximum release achievable per meter-square of FA based perovskite solar cell

The weight of one thin-film of 1 m<sup>2</sup> of surface and 500 nm thickness of FAPbI<sub>3</sub> or FAPbBr<sub>3</sub> is

$$W_{FAPbX_3/m^2} = V_{m^2} \cdot \rho_{FAPbX_3}$$

Where  $W_{FAPbX_3/m^2}$  is the weight of perovskite contained in the thin-film of 1 m<sup>2</sup> of surface and 500 nm thickness.

$V_{m^2}$  is the volume of this thin-film.  $V_{m^2} = 0.5 \text{ cm}^3$  and  $\rho_{FAPbX_3}$  is the crystal density obtained from cif files reported for the  $\alpha$ -FAPbI<sub>3</sub><sup>1</sup> or FAPbBr<sub>3</sub><sup>2</sup>.

$$W_{FAPbI_3/m^2} = 2505 \text{ mg}$$

$$W_{FAPbBr_3/m^2} = 1880 \text{ mg}$$

Atomic weight percent of FAPbI<sub>3</sub> ( $M_{wFAPbI_3} = 632.98 \text{ mg/mmol}$ )

|    |         |
|----|---------|
| C  | 1.90 %  |
| H  | 0.80 %  |
| N  | 4.43 %  |
| Pb | 32.73 % |
| I  | 60.15 % |

Atomic weight percent of FAPbBr<sub>3</sub> ( $M_{wFAPbBr_3} = 491.98 \text{ mg/mmol}$ )

|    |         |
|----|---------|
| C  | 2.44 %  |
| H  | 1.02 %  |
| N  | 5.69 %  |
| Pb | 42.12 % |
| Br | 48.72 % |

$$M_{wFA^+} = 45.06 \text{ mg/mmol}; M_{wHCN} = 27.02 \text{ mg/mmol}$$

The maximum HCN release achievable per meter-square of FA based perovskite solar cell is,

$$W_{HCN/m^2} = W_{FAPbX_3/m^2} \cdot (\% CHN)_{FAPbX_3} \cdot M_{wHCN} / M_{wFA}$$

The maximum observed hydrogen cyanide instantaneous partial pressure during low temperature heating tests was  $P_{HCN} = 1.36 \cdot 10^{-7} \text{ torr}$  at 85 °C, see Figure S6. The equivalent HCN concentration in mg/m<sup>3</sup> is obtained as,

$$C_{\text{max} - HCN/m^2} = \frac{P_{HCN} M_{wHCN}}{S_{HCN} \cdot R \cdot T} \cdot \frac{W_{FAPbBr_3/m^2}}{W_{\text{sample}}}$$

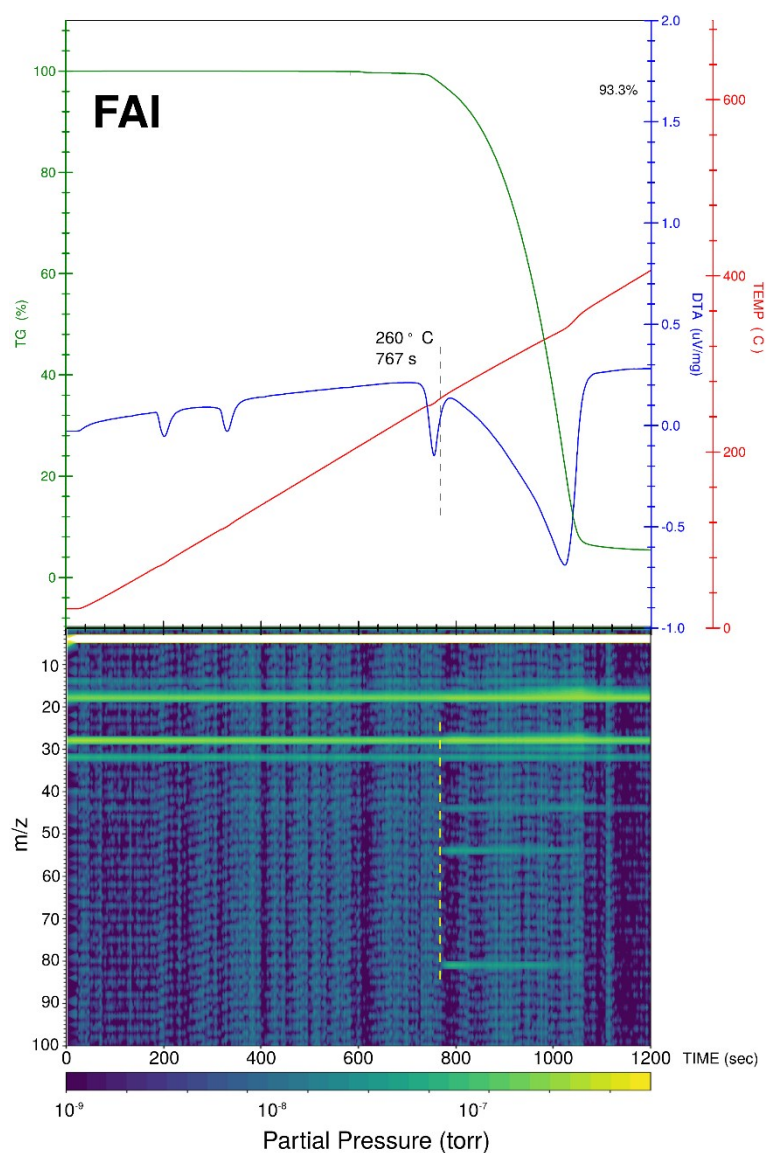

**Figure S1.** Tandem TG-DTA/MS coupled experiments for FAI. Top panel shows a one-step type mass loss TG pattern (green line). Bottom panel shows the MS traces simultaneously recorded (1-100 amu) during the experiments. Gray dash line indicates the initial temperature (time) of the first detection of the released gases during the high-temperature thermal degradation.

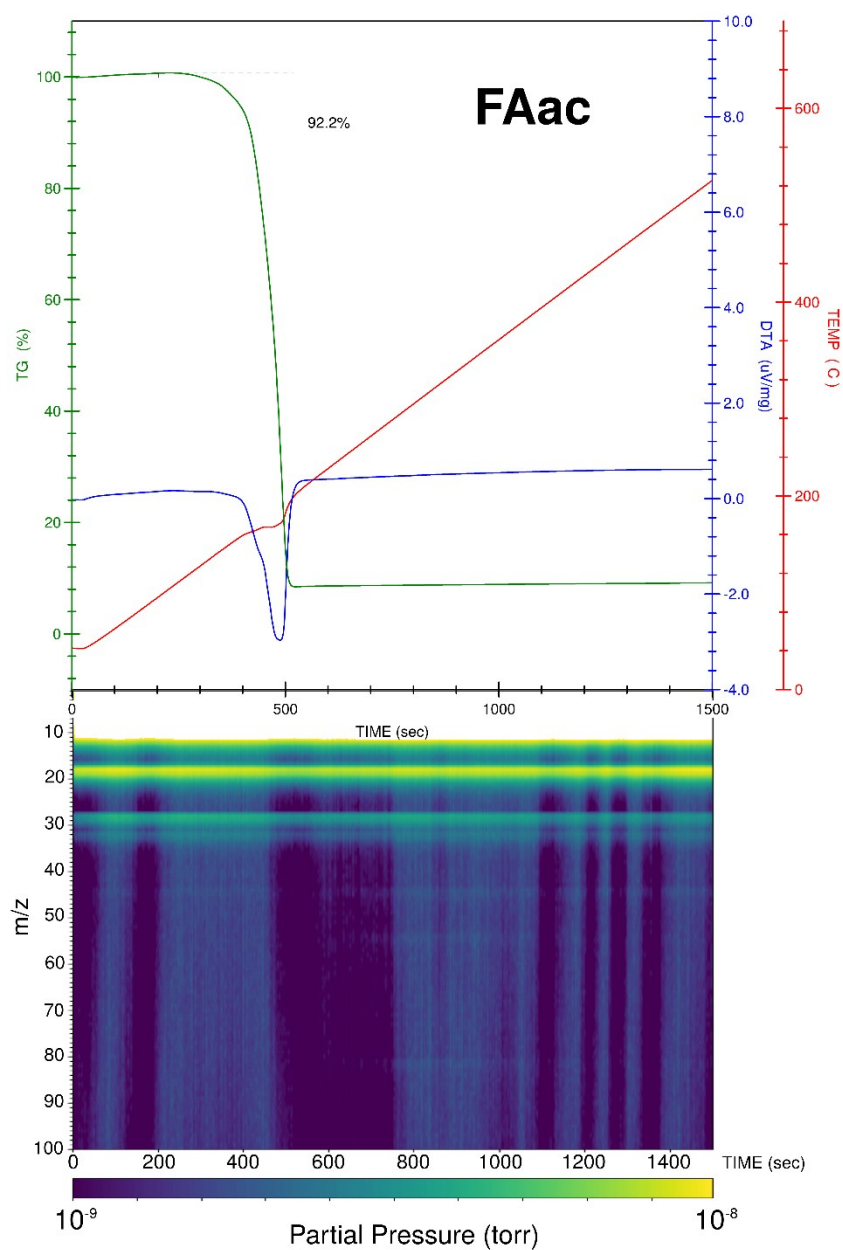

**Figure S2.** Tandem TG-DTA/MS coupled experiments for FAac (formamidine acetate). Top panel shows a one-step type mass loss TG pattern (green line). Bottom panel shows the MS traces simultaneously recorded (1-100 amu) during the experiments. There is a concurrent process of sublimation of FAac obscuring clear observation of released products during degradation.

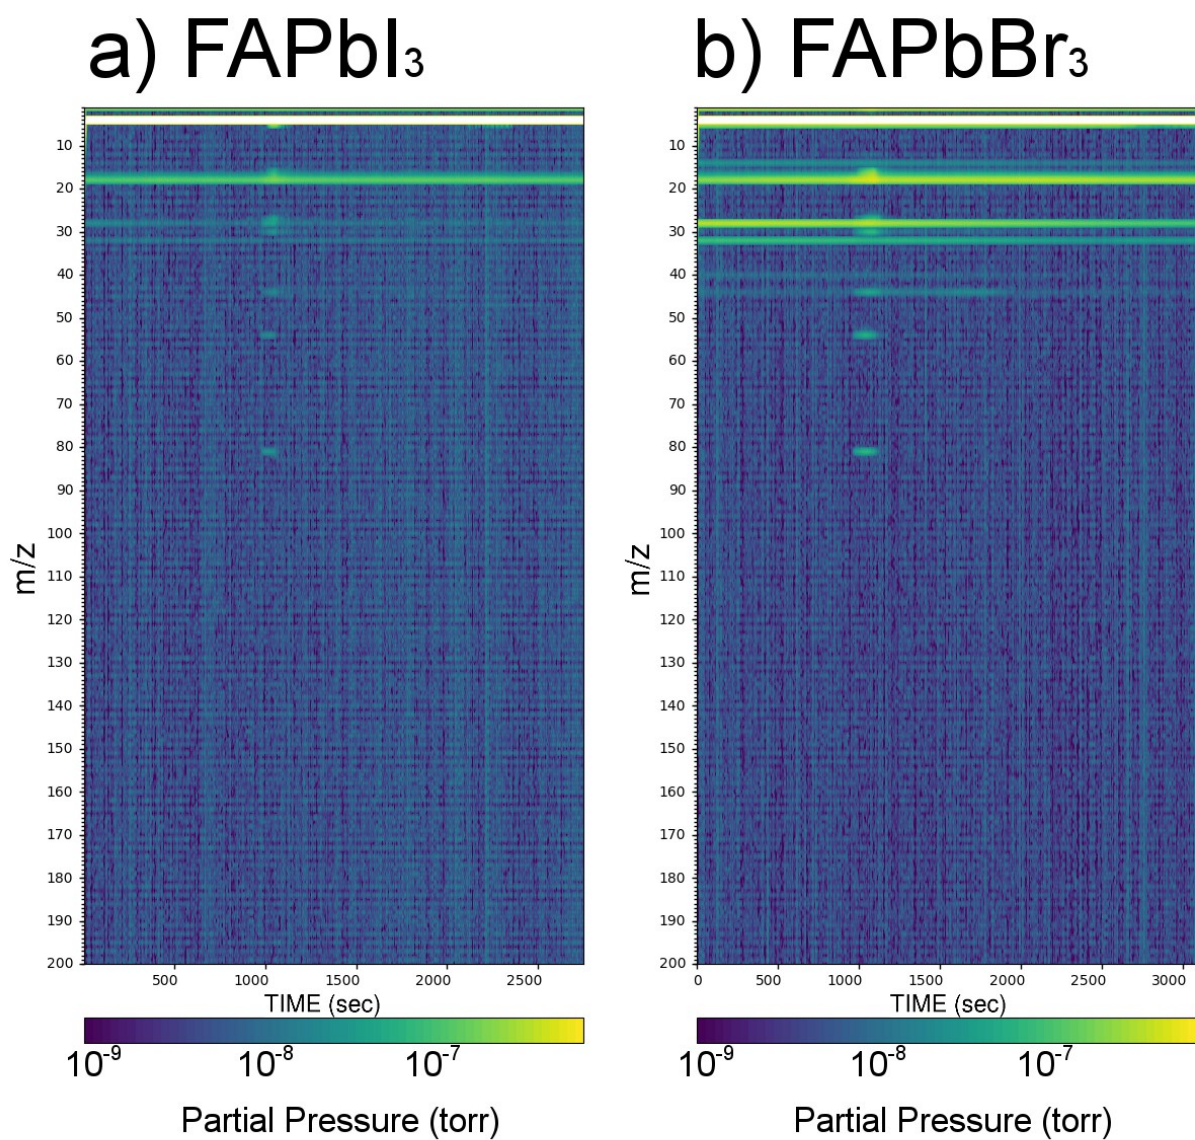

**Figure S3.** Full MS spectra (1-200 amu) for the tandem TG-DTA/MS coupled experiments shown in Figure 1 for a)  $\text{FAPbI}_3$  and b)  $\text{FAPbBr}_3$ .



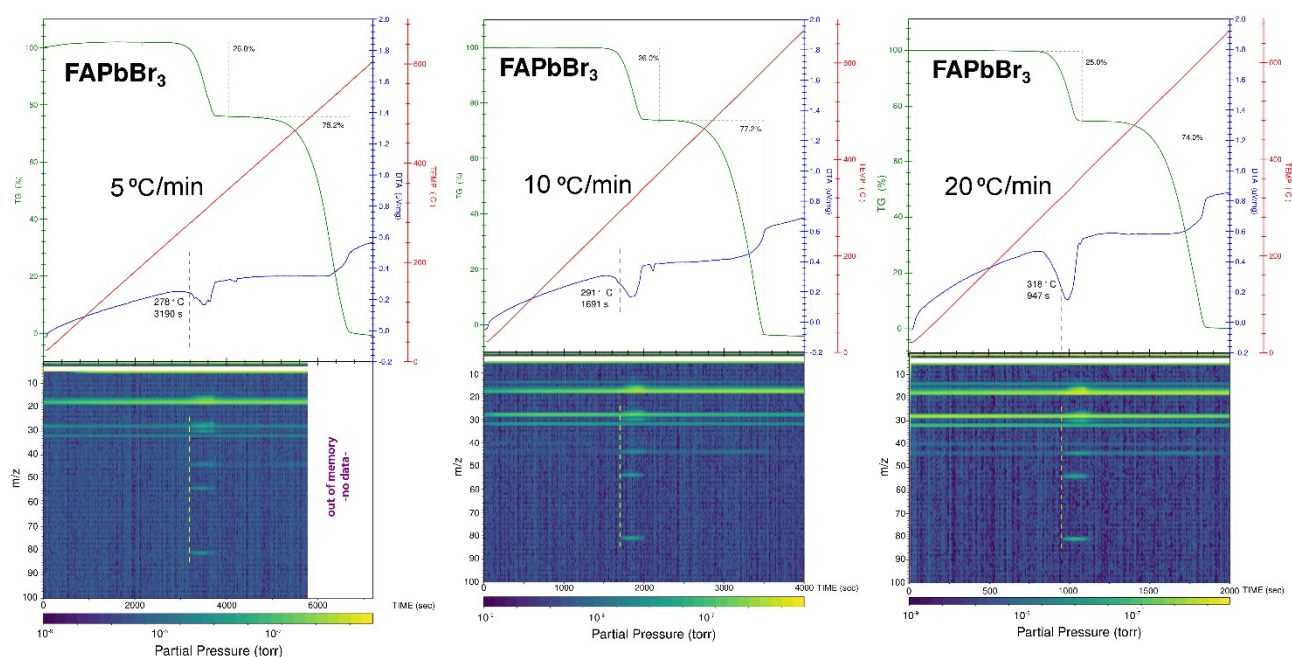

**Figure S4.** Tandem TG-DTA/MS coupled experiments for  $\text{FAPbBr}_3$  at 3 different heating rates, 5 °C/min (left), 10 °C/min (center) and 20 °C/min (right). Top panels show the archetypal two-step type mass loss TG patterns (green line) for  $\text{FAPbBr}_3$ . Bottom panels show MS traces simultaneously recorded (1-100 amu) during the experiments. Gray dash lines indicate the initial temperature (time) of the first detection of the released gases during the high-temperature thermal degradation.

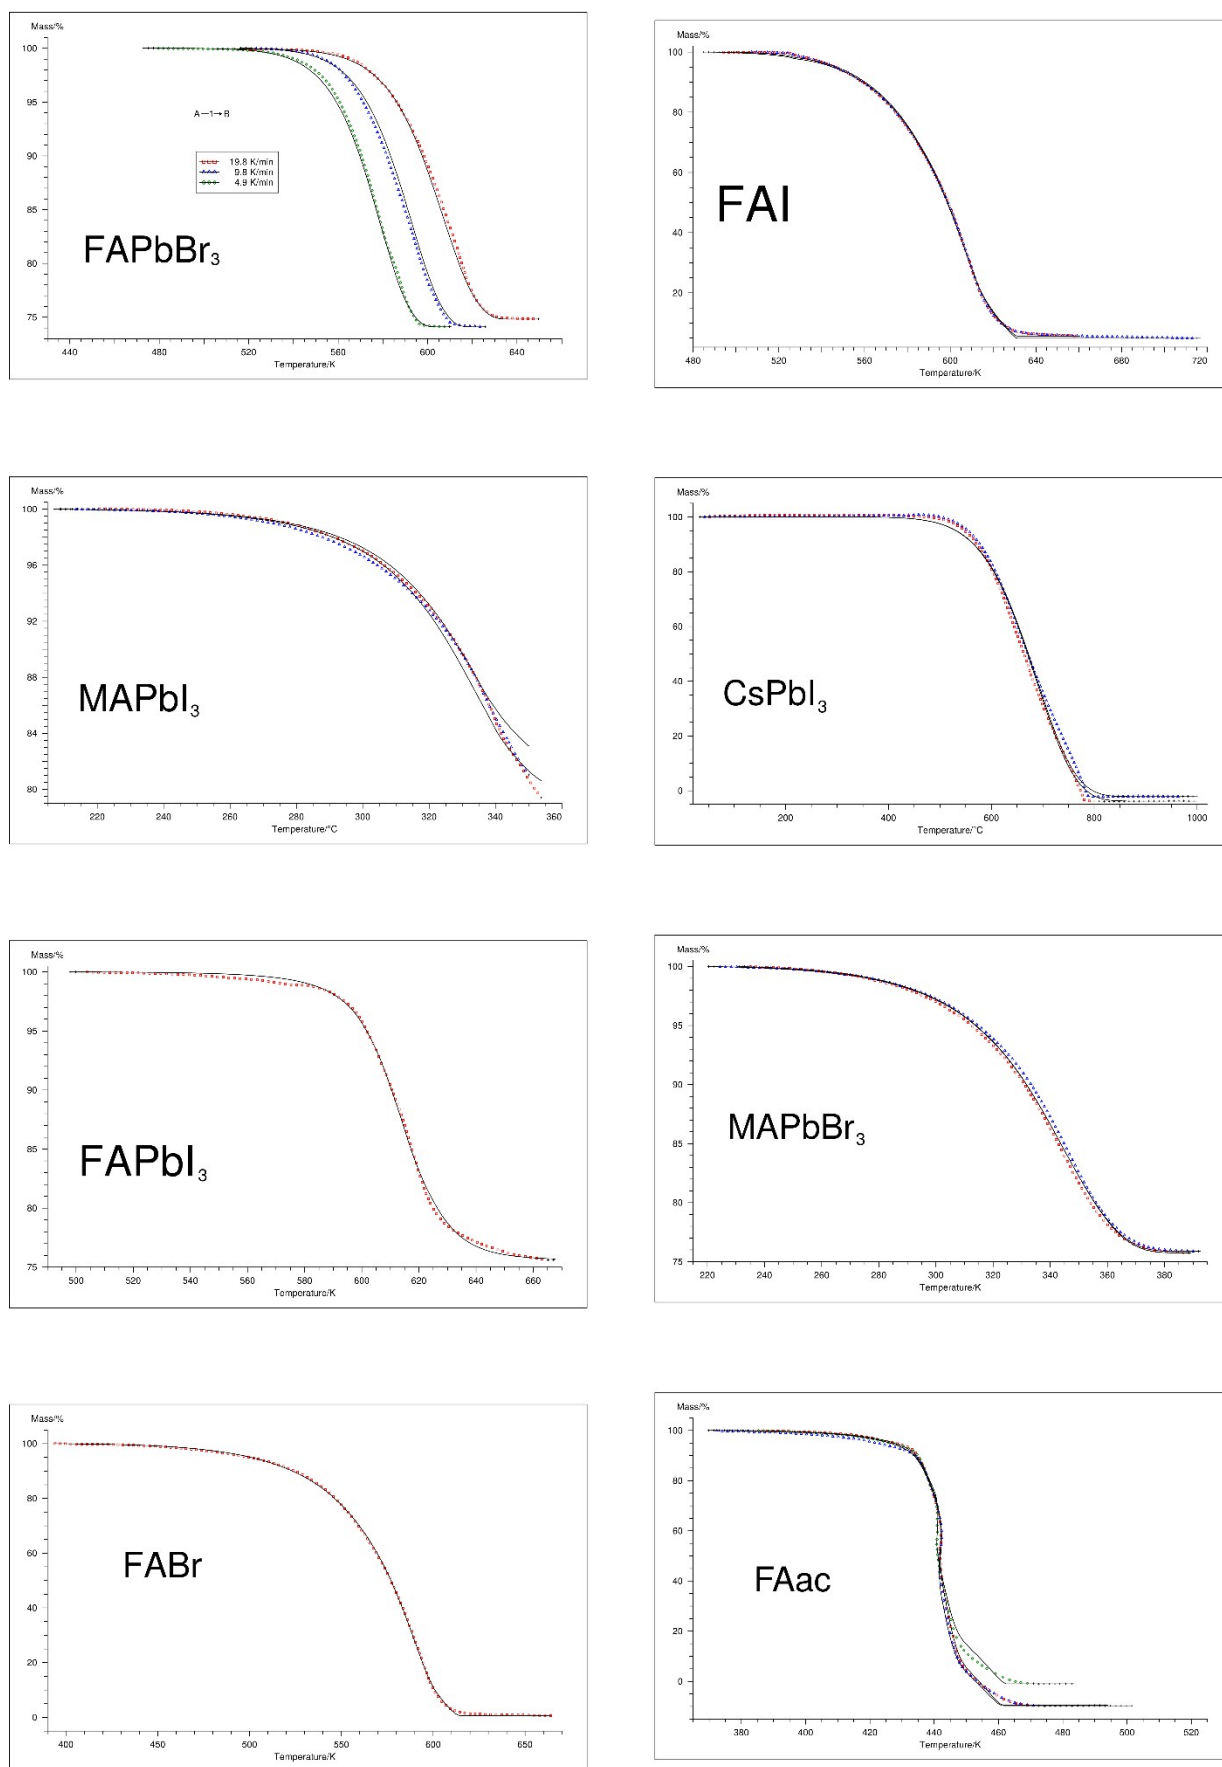

**Figure S5.** Graphical comparisons of the theoretical fittings (solid lines) and experimental data (symbols) for TG curves during the first mass loss step of MAPbBr<sub>3</sub>, FAPbBr<sub>3</sub>, MAPbI<sub>3</sub>, FAPbI<sub>3</sub> and the unique mass loss step of precursors FAI, FABr and FAac, and all inorganic perovskite CsPbI<sub>3</sub>.

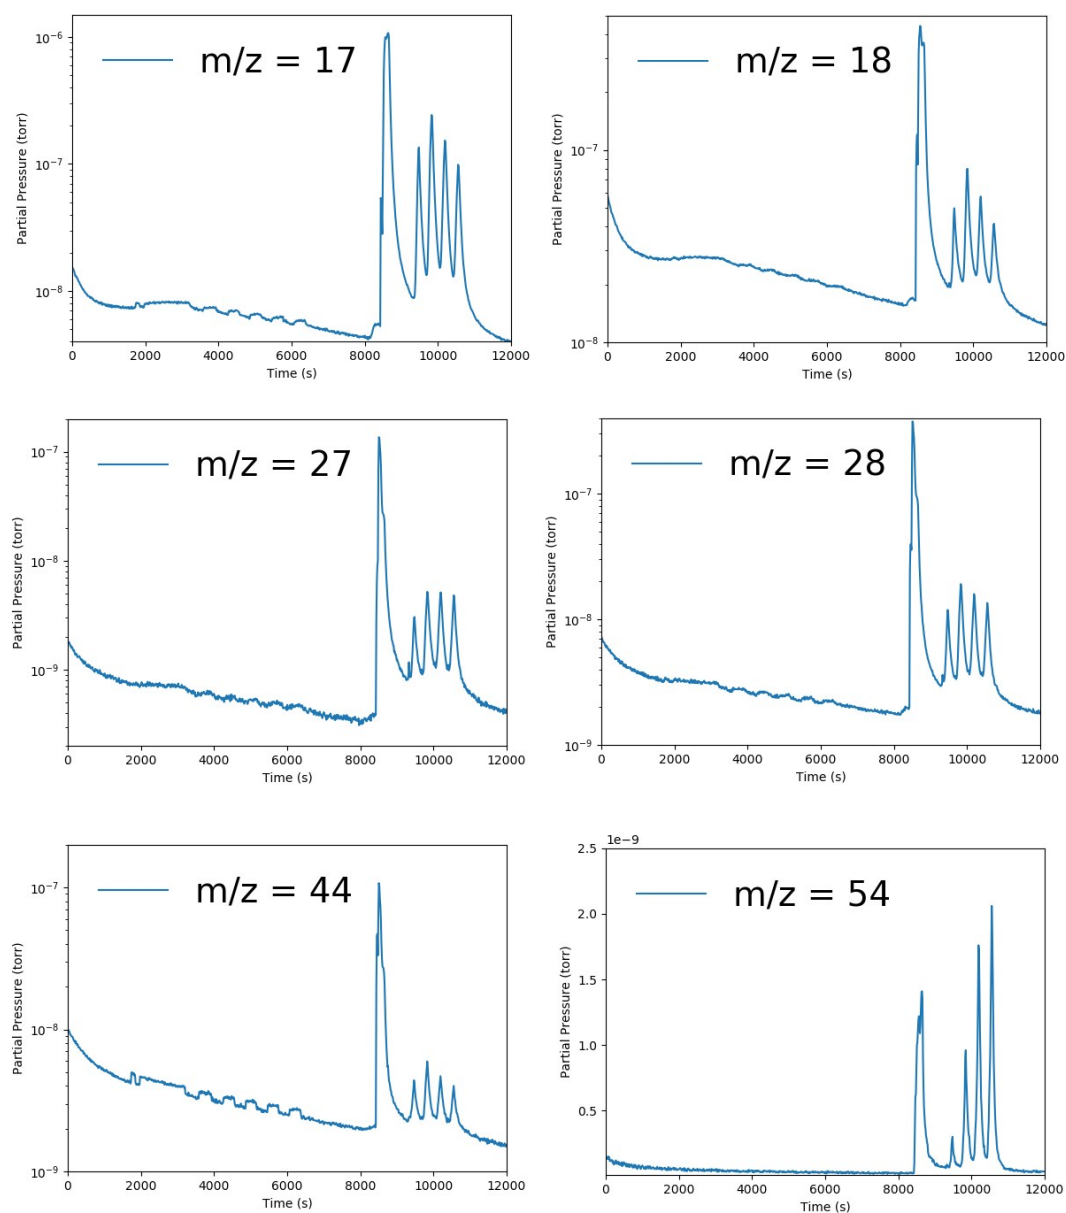

**Figure S6.** Raw  $m/z$  ratio traces (non-calibrated) recorded for NH<sub>3</sub> (17 amu), NH<sub>4</sub><sup>+</sup> (18 amu), HCN (27 amu), N<sub>2</sub><sup>+</sup> (28 amu), formamidine HCN<sub>2</sub>H<sub>3</sub> (44 amu) and *sym*-triazine (54 amu) fragment.



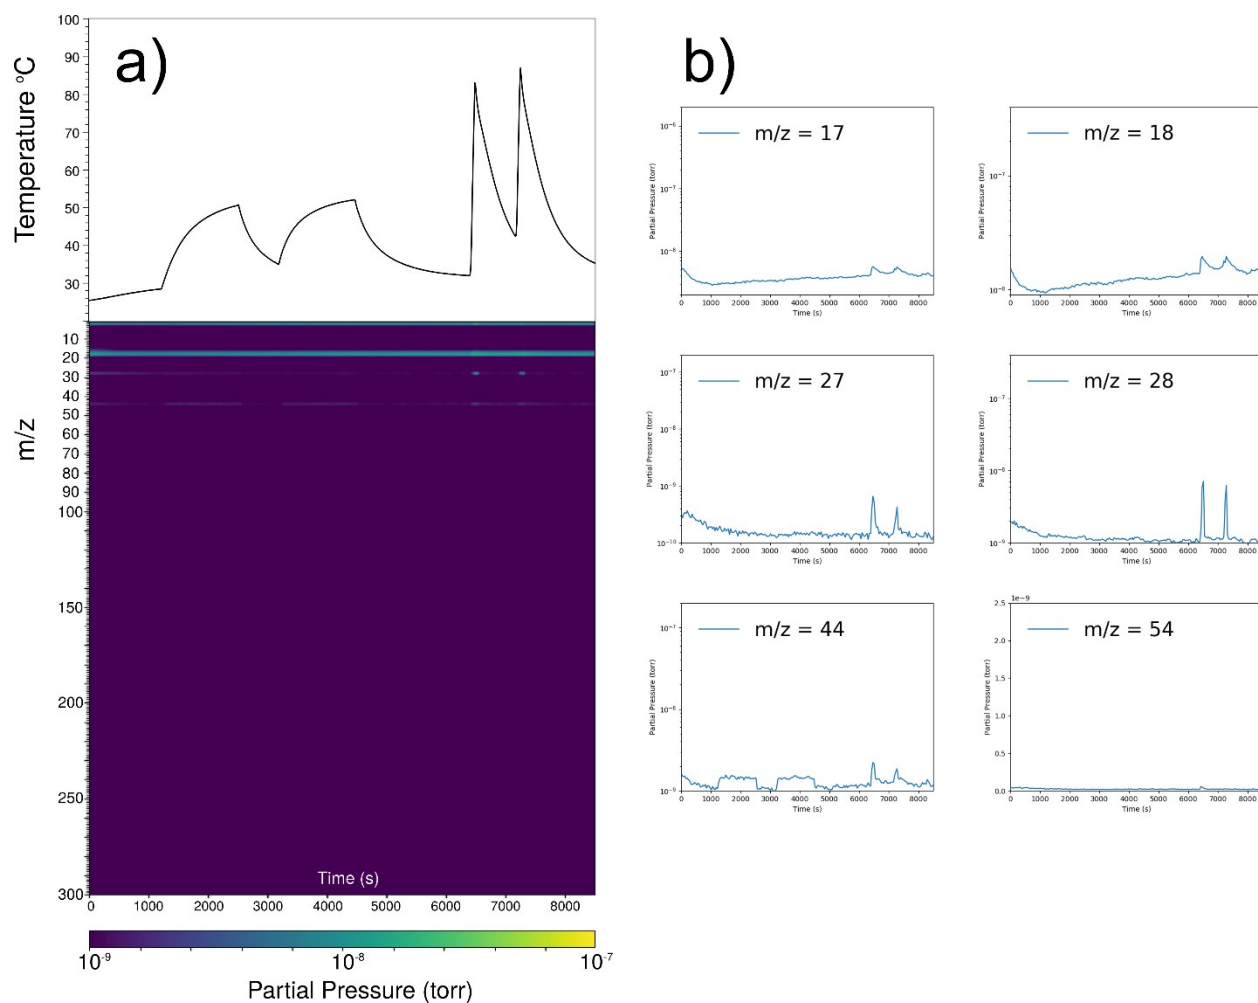

**Figure S7.** a) Mass spectrometry profiles of the empty 6-ways cross chamber recorded during illumination and heating-in-the-dark pulsed experiments. The sample holder temperature is recorded during light pulses and heating on/off intervals on the empty sample holder. b) Time dependent m/z traces of selected relevant amu registered during the thermal test of the chamber under light or dark conditions.

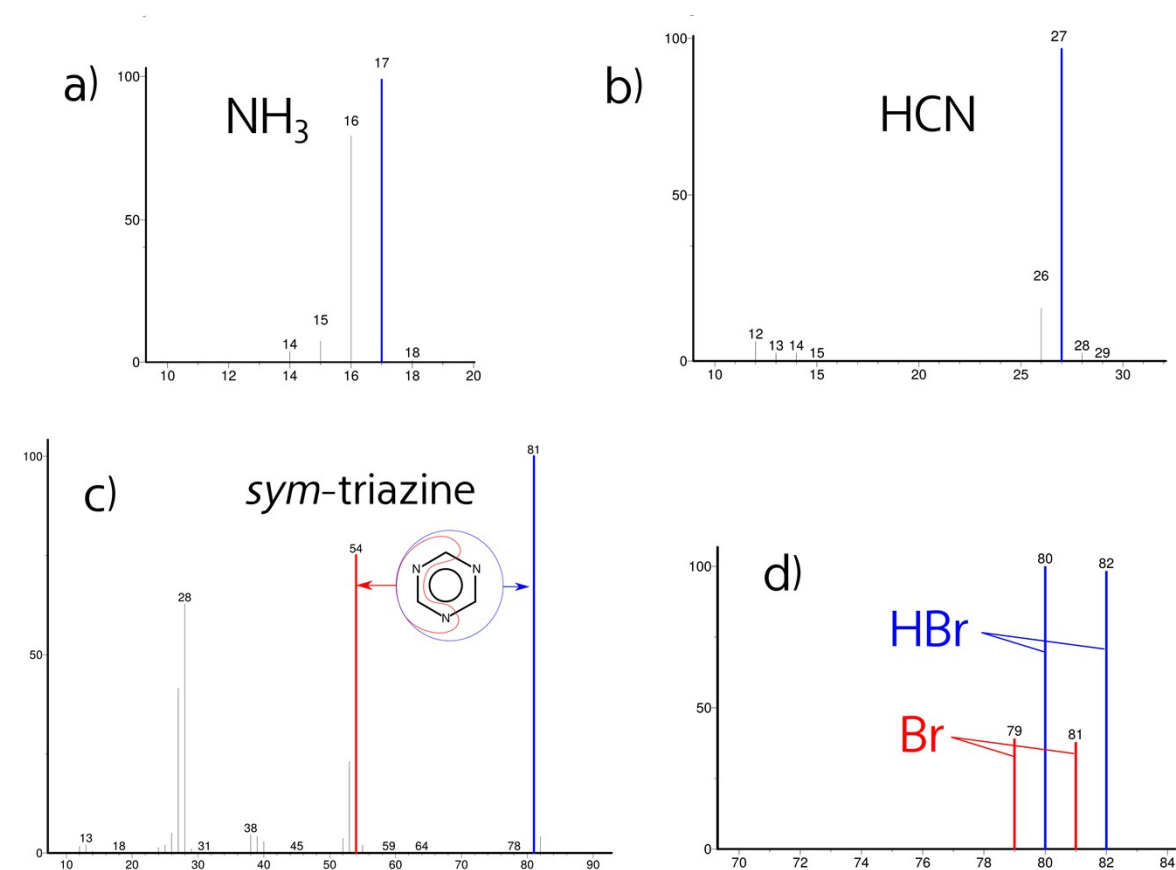

**Figure S8.** Fragmentation patterns m/z peaks retrieved from the NIST MS library data (<http://webbook.nist.gov/chemistry/>) for a) ammonia, b) hydrogen cyanide, c) *sym*-triazine and d) hydrogen bromide.

1. C. C. Stoumpos, C. D. Malliakas and M. G. Kanatzidis, *Inorg. Chem.*, 2013, **52**, 9019-9038.
2. S. Govinda, B. P. Kore, D. Swain, A. Hossain, C. De, T. N. Guru Row and D. Sarma, *The Journal of Physical Chemistry C*, 2018, **122**, 13758-13766.
